# Supplementary material for: Rhein Improves Renal Fibrosis by Restoring Cpt1a-Mediated Fatty Acid Oxidation through SirT1/STAT3/twist1 Pathway
Source: MDPI journal article supplement (doi:10.3390/molecules27072344), 2022-04-06
Supplement: s1 [file s1]

# Rhein Improves Renal Fibrosis by Restoring Cpt1a-Mediated Fatty Acid Oxidation through SirT1/STAT3/Twist1 Pathway

Xianrui Song <sup>1</sup>, Zesen Du <sup>1</sup>, Zhenqi Yao <sup>1</sup>, Xiaoyan Tang <sup>1</sup> and Mian Zhang <sup>1,2,\*</sup>

<sup>1</sup> School of Traditional Chinese Medicine, China Pharmaceutical University, Nanjing 211198, China

<sup>2</sup> Mian Zhang, School of Traditional Chinese Medicine, China Pharmaceutical University, No.639 Longmian Road, Nanjing 211198, China

\* herbs@cpu.edu.cn; Tel.: +86-2586185137

## Supplemental materials

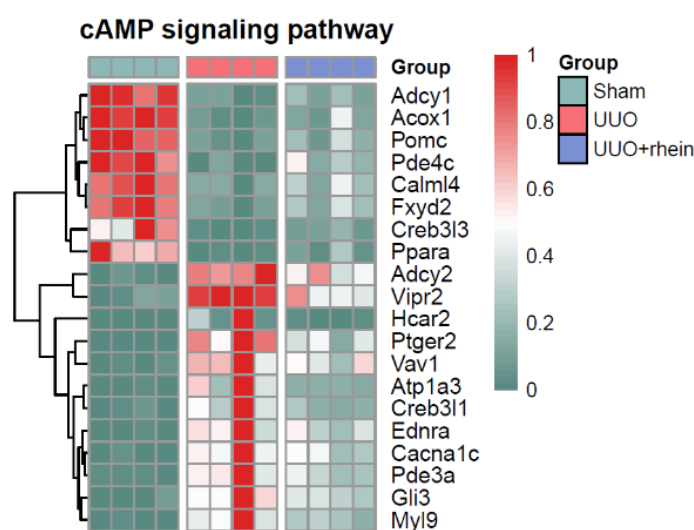

**Figure S1.** Heatmap of RNA sequencing genes associated with cAMP signaling pathway ( $n = 4$ ).

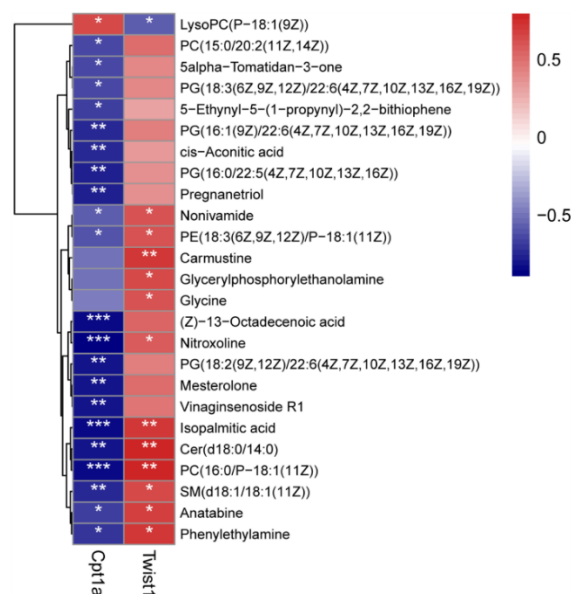

**Figure S2.** Heatmap of the relationship between Twist1 & Cpt1a genes and differential metabolites.

\*  $p < 0.05$ , \*\*  $p < 0.01$ , \*\*\*  $p < 0.001$ , gene correlated metabolites.

**Table S1. Primers for q-PCR**

| Primers        | Direction | Sequences                     |
|----------------|-----------|-------------------------------|
| Acot1          | Forward   | 5'-ACCGCTTTTGGTTTACA-3'       |
|                | Reverse   | 5'-GATTGAACCCAGGAACTT-3'      |
| Acta2          | Forward   | 5'-CACTACCATGTACCCAGGCA-3'    |
|                | Reverse   | 5'-CATATAGCGGTGGACAATGGA-3'   |
| Col1a1         | Forward   | 5'-CAGGCTGGTGTGATGGGATT-3'    |
|                | Reverse   | 5'-CACCTCGTTCTCCAGCCTTT-3'    |
| Col2a1         | Forward   | 5'-CGCTCAAGTCGCTGAACAACCA-3'  |
|                | Reverse   | 5'-ACCAGTTCTTCCGACGCACAGT-3'  |
| Col3a1         | Forward   | 5'-AGTGGCCATAATGGGGAACG-3'    |
|                | Reverse   | 5'-CAG GGTTCCTATCCCTTCCG-3'   |
| Col4a1         | Forward   | 5'-GTGCGGTTTGTGAAGCACCG-3'    |
|                | Reverse   | 5'-GTTCTTCTCATGCACACTTC-3'    |
| Cpt1a          | Forward   | 5'-ACCCAGTCAGATTCCAACCA-3'    |
|                | Reverse   | 5'-TCAAGAAAGGCACTCCCCT-3'     |
| Cpt1b          | Forward   | 5'-CATGTATCGCCGCAAACCTGG-3'   |
|                | Reverse   | 5'-CCTGGGATGCGTGTAGTGTT-3'    |
| Cpt1c          | Forward   | 5'-GGATGGCACTGAAGAGGAAA-3'    |
|                | Reverse   | 5'-TCCTGGAAAAGGCATCTCTC-3'    |
| Cpt2           | Forward   | 5'-GCCCCAAACCCCATTTTCTA-3'    |
|                | Reverse   | 5'-TAGGCAGAGGCAGAAGACAGCA-3'  |
| Decr1          | Forward   | 5'-GTACGGCAATGGCTTTATCA-3'    |
|                | Reverse   | 5'-CAATCCCCTCCTGCAACTT-3'     |
| E-cadherin     | Forward   | 5'-AGGTCGGTGCCCGTATTG-3'      |
|                | Reverse   | 5'-TGGTCTTGGGGTCTGTGATG-3'    |
| Fn             | Forward   | 5'-GTTGGTTGCCCTGTTCTGC-3'     |
|                | Reverse   | 5'-GGCTACCTGTGTTTCCCTTTG-3'   |
| Twist1         | Forward   | 5'-CGCACCCAGTCGCTGAACG-3'     |
|                | Reverse   | 5'-CCGCCAGTTTGAGGGTCTGAATC-3' |
| TGF- $\beta$   | Forward   | 5'-CATGGAGCTGGTGAAACGGAAG-3'  |
|                | Reverse   | 5'-GACTGGCGAGCCTTAGTTTGGAC-3' |
| Vimentin       | Forward   | 5'-TCAGACAGGATGTTGACAAT-3'    |
|                | Reverse   | 5'-GACATGCTGTTCTGAATCT-3'     |
| $\beta$ -actin | Forward   | 5'-CCGAGGGCCCACTAAAGG-3'      |
|                | Reverse   | 5'-GCTGTTGAAGTCACAGGAGACAA-3' |

**Table S2. KEGG analysis of transcriptome data**

| Description                                                   | q-value  |
|---------------------------------------------------------------|----------|
| Cytokine-cytokine receptor interaction                        | 7.43E-21 |
| Viral protein interaction with cytokine and cytokine receptor | 2.92E-14 |
| Cell adhesion molecules                                       | 6.10E-13 |
| PI3K-Akt signaling pathway                                    | 2.90E-12 |
| Hematopoietic cell lineage                                    | 5.95E-11 |
| Chemokine signaling pathway                                   | 1.49E-09 |
| Dilated cardiomyopathy                                        | 1.81E-09 |
| ECM-receptor interaction                                      | 2.37E-09 |
| Osteoclast differentiation                                    | 5.60E-09 |
| Hypertrophic cardiomyopathy                                   | 1.57E-08 |

---

|                                                                 |          |
|-----------------------------------------------------------------|----------|
| TNF signaling pathway                                           | 2.37E−08 |
| MAPK signaling pathway                                          | 2.74E−08 |
| Arrhythmogenic right ventricular cardiomyopathy                 | 2.90E−08 |
| Toxoplasmosis                                                   | 6.04E−08 |
| JAK-STAT signaling pathway                                      | 7.69E−08 |
| Amoebiasis                                                      | 1.05E−07 |
| Complement and coagulation cascades                             | 1.46E−07 |
| Epstein-Barr virus infection                                    | 1.82E−07 |
| Human papillomavirus infection                                  | 1.86E−07 |
| Focal adhesion                                                  | 2.93E−07 |
| Rap1 signaling pathway                                          | 3.17E−07 |
| Platelet activation                                             | 4.43E−07 |
| Human T-cell leukemia virus 1 infection                         | 1.61E−06 |
| NF-kappa B signaling pathway                                    | 1.61E−06 |
| Malaria                                                         | 1.99E−06 |
| Leishmaniasis                                                   | 2.09E−06 |
| Measles                                                         | 2.53E−06 |
| Small cell lung cancer                                          | 3.69E−06 |
| AGE-RAGE signaling pathway in diabetic complications            | 3.93E−06 |
| Th17 cell differentiation                                       | 3.93E−06 |
| Chagas disease                                                  | 3.93E−06 |
| Coronavirus disease – COVID-19                                  | 7.08E−06 |
| Kaposi sarcoma-associated herpesvirus infection                 | 8.51E−06 |
| Th1 and Th2 cell differentiation                                | 8.51E−06 |
| Ras signaling pathway                                           | 1.21E−05 |
| Pertussis                                                       | 1.21E−05 |
| Viral myocarditis                                               | 1.49E−05 |
| Tuberculosis                                                    | 1.49E−05 |
| Protein digestion and absorption                                | 1.63E−05 |
| Rheumatoid arthritis                                            | 2.00E−05 |
| Legionellosis                                                   | 2.11E−05 |
| Inflammatory bowel disease                                      | 2.32E−05 |
| Valine, leucine and isoleucine degradation                      | 2.80E−05 |
| Phagosome                                                       | 3.75E−05 |
| Human cytomegalovirus infection                                 | 3.75E−05 |
| Relaxin signaling pathway                                       | 4.06E−05 |
| Yersinia infection                                              | 4.82E−05 |
| Salmonella infection                                            | 5.62E−05 |
| Leukocyte transendothelial migration                            | 5.62E−05 |
| PD-L1 expression and PD-1 checkpoint pathway in cancer          | 1.17E−04 |
| Parathyroid hormone synthesis, secretion and action             | 1.41E−04 |
| Influenza A                                                     | 1.41E−04 |
| Toll-like receptor signaling pathway                            | 1.48E−04 |
| Primary immunodeficiency                                        | 1.60E−04 |
| Glyoxylate and dicarboxylate metabolism                         | 1.70E−04 |
| C-type lectin receptor signaling pathway                        | 2.06E−04 |
| Circadian entrainment                                           | 2.39E−04 |
| Transcriptional misregulation in cancer                         | 2.81E−04 |
| Gap junction                                                    | 3.37E−04 |
| Glycosaminoglycan biosynthesis - chondroitin sulfate / dermatan | 3.49E−04 |

---

|                                              |          |
|----------------------------------------------|----------|
| sulfate                                      |          |
| Axon guidance                                | 3.49E−04 |
| T cell receptor signaling pathway            | 4.68E−04 |
| Tryptophan metabolism                        | 5.49E−04 |
| Hepatitis B                                  | 5.61E−04 |
| Hepatitis C                                  | 6.71E−04 |
| Lipid and atherosclerosis                    | 6.80E−04 |
| Apoptosis                                    | 8.34E−04 |
| Proteoglycans in cancer                      | 8.34E−04 |
| Intestinal immune network for IgA production | 9.20E−04 |
| NOD-like receptor signaling pathway          | 9.25E−04 |
| cAMP signaling pathway                       | 9.52E−04 |
| Cysteine and methionine metabolism           | 9.77E−04 |
| Regulation of actin cytoskeleton             | 1.09E−03 |
| Oxytocin signaling pathway                   | 1.18E−03 |
| Prostate cancer                              | 1.18E−03 |
| Staphylococcus aureus infection              | 1.22E−03 |
| Glycine, serine and threonine metabolism     | 1.62E−03 |
| Lysine degradation                           | 1.78E−03 |
| Adrenergic signaling in cardiomyocytes       | 1.96E−03 |
| Fc gamma R-mediated phagocytosis             | 1.96E−03 |
| Alcoholic liver disease                      | 2.09E−03 |
| Natural killer cell mediated cytotoxicity    | 2.26E−03 |
| B cell receptor signaling pathway            | 2.53E−03 |
| Amphetamine addiction                        | 2.82E−03 |
| Viral carcinogenesis                         | 3.18E−03 |
| Cocaine addiction                            | 3.18E−03 |
| Breast cancer                                | 3.22E−03 |
| Cell cycle                                   | 5.23E−03 |
| Hepatocellular carcinoma                     | 5.23E−03 |
| Glutamatergic synapse                        | 5.69E−03 |
| Notch signaling pathway                      | 6.45E−03 |
| Insulin secretion                            | 6.87E−03 |
| Cellular senescence                          | 7.09E−03 |
| Phospholipase D signaling pathway            | 7.17E−03 |
| Morphine addiction                           | 7.18E−03 |
| Cholinergic synapse                          | 8.19E−03 |
| Glioma                                       | 1.04E−02 |
| Vascular smooth muscle contraction           | 1.08E−02 |
| IL-17 signaling pathway                      | 1.09E−02 |
| cGMP-PKG signaling pathway                   | 1.09E−02 |
| Acute myeloid leukemia                       | 1.13E−02 |
| ABC transporters                             | 1.15E−02 |
| Cushing syndrome                             | 1.25E−02 |
| Fluid shear stress and atherosclerosis       | 1.25E−02 |
| Other types of O-glycan biosynthesis         | 1.26E−02 |
| Colorectal cancer                            | 1.32E−02 |
| Mucin type O-glycan biosynthesis             | 1.33E−02 |
| Thyroid hormone synthesis                    | 1.51E−02 |
| EGFR tyrosine kinase inhibitor resistance    | 1.58E−02 |

|                                                               |          |
|---------------------------------------------------------------|----------|
| Endocrine resistance                                          | 1.69E−02 |
| Inflammatory mediator regulation of TRP channels              | 1.73E−02 |
| DNA replication                                               | 1.73E−02 |
| Human immunodeficiency virus 1 infection                      | 1.75E−02 |
| GABAergic synapse                                             | 1.75E−02 |
| Salivary secretion                                            | 1.81E−02 |
| Apelin signaling pathway                                      | 1.88E−02 |
| Chronic myeloid leukemia                                      | 1.91E−02 |
| Cortisol synthesis and secretion                              | 1.94E−02 |
| Melanogenesis                                                 | 1.99E−02 |
| Gastric acid secretion                                        | 1.99E−02 |
| Pancreatic cancer                                             | 1.99E−02 |
| Adherens junction                                             | 2.10E−02 |
| One carbon pool by folate                                     | 2.10E−02 |
| 2-Oxocarboxylic acid metabolism                               | 2.10E−02 |
| Basal cell carcinoma                                          | 2.10E−02 |
| Estrogen signaling pathway                                    | 2.14E−02 |
| Fatty acid degradation                                        | 2.16E−02 |
| Antifolate resistance                                         | 2.16E−02 |
| Calcium signaling pathway                                     | 2.32E−02 |
| Hippo signaling pathway                                       | 2.48E−02 |
| Antigen processing and presentation                           | 2.49E−02 |
| Gastric cancer                                                | 2.52E−02 |
| Description                                                   | q-value  |
| Cytokine-cytokine receptor interaction                        | 7.43E−21 |
| Viral protein interaction with cytokine and cytokine receptor | 2.92E−14 |
| Cell adhesion molecules                                       | 6.10E−13 |
| PI3K-Akt signaling pathway                                    | 2.90E−12 |
| Hematopoietic cell lineage                                    | 5.95E−11 |
| Chemokine signaling pathway                                   | 1.49E−09 |
| Dilated cardiomyopathy                                        | 1.81E−09 |
| ECM-receptor interaction                                      | 2.37E−09 |
| Osteoclast differentiation                                    | 5.60E−09 |
| Hypertrophic cardiomyopathy                                   | 1.57E−08 |
| TNF signaling pathway                                         | 2.37E−08 |
| MAPK signaling pathway                                        | 2.74E−08 |
| Arrhythmogenic right ventricular cardiomyopathy               | 2.90E−08 |
| Toxoplasmosis                                                 | 6.04E−08 |
| JAK-STAT signaling pathway                                    | 7.69E−08 |
| Amoebiasis                                                    | 1.05E−07 |
| Complement and coagulation cascades                           | 1.46E−07 |
| Epstein-Barr virus infection                                  | 1.82E−07 |
| Human papillomavirus infection                                | 1.86E−07 |
| Focal adhesion                                                | 2.93E−07 |
| Rap1 signaling pathway                                        | 3.17E−07 |
| Platelet activation                                           | 4.43E−07 |
| Human T-cell leukemia virus 1 infection                       | 1.61E−06 |
| NF-kappa B signaling pathway                                  | 1.61E−06 |
| Malaria                                                       | 1.99E−06 |
| Leishmaniasis                                                 | 2.09E−06 |

---

|                                                                         |          |
|-------------------------------------------------------------------------|----------|
| Measles                                                                 | 2.53E−06 |
| Small cell lung cancer                                                  | 3.69E−06 |
| AGE-RAGE signaling pathway in diabetic complications                    | 3.93E−06 |
| Th17 cell differentiation                                               | 3.93E−06 |
| Chagas disease                                                          | 3.93E−06 |
| Coronavirus disease - COVID-19                                          | 7.08E−06 |
| Kaposi sarcoma-associated herpesvirus infection                         | 8.51E−06 |
| Th1 and Th2 cell differentiation                                        | 8.51E−06 |
| Ras signaling pathway                                                   | 1.21E−05 |
| Pertussis                                                               | 1.21E−05 |
| Viral myocarditis                                                       | 1.49E−05 |
| Tuberculosis                                                            | 1.49E−05 |
| Protein digestion and absorption                                        | 1.63E−05 |
| Rheumatoid arthritis                                                    | 2.00E−05 |
| Legionellosis                                                           | 2.11E−05 |
| Inflammatory bowel disease                                              | 2.32E−05 |
| Valine, leucine and isoleucine degradation                              | 2.80E−05 |
| Phagosome                                                               | 3.75E−05 |
| Human cytomegalovirus infection                                         | 3.75E−05 |
| Relaxin signaling pathway                                               | 4.06E−05 |
| Yersinia infection                                                      | 4.82E−05 |
| Salmonella infection                                                    | 5.62E−05 |
| Leukocyte transendothelial migration                                    | 5.62E−05 |
| PD-L1 expression and PD-1 checkpoint pathway in cancer                  | 1.17E−04 |
| Parathyroid hormone synthesis, secretion and action                     | 1.41E−04 |
| Influenza A                                                             | 1.41E−04 |
| Toll-like receptor signaling pathway                                    | 1.48E−04 |
| Primary immunodeficiency                                                | 1.60E−04 |
| Glyoxylate and dicarboxylate metabolism                                 | 1.70E−04 |
| C-type lectin receptor signaling pathway                                | 2.06E−04 |
| Circadian entrainment                                                   | 2.39E−04 |
| Transcriptional misregulation in cancer                                 | 2.81E−04 |
| Gap junction                                                            | 3.37E−04 |
| Glycosaminoglycan biosynthesis - chondroitin sulfate / dermatan sulfate | 3.49E−04 |
| Axon guidance                                                           | 3.49E−04 |
| T cell receptor signaling pathway                                       | 4.68E−04 |
| Tryptophan metabolism                                                   | 5.49E−04 |
| Hepatitis B                                                             | 5.61E−04 |
| Hepatitis C                                                             | 6.71E−04 |
| Lipid and atherosclerosis                                               | 6.80E−04 |
| Apoptosis                                                               | 8.34E−04 |
| Proteoglycans in cancer                                                 | 8.34E−04 |
| Intestinal immune network for IgA production                            | 9.20E−04 |
| NOD-like receptor signaling pathway                                     | 9.25E−04 |
| cAMP signaling pathway                                                  | 9.52E−04 |
| Cysteine and methionine metabolism                                      | 9.77E−04 |
| Regulation of actin cytoskeleton                                        | 1.09E−03 |
| Oxytocin signaling pathway                                              | 1.18E−03 |
| Prostate cancer                                                         | 1.18E−03 |

---

|                                                  |          |
|--------------------------------------------------|----------|
| Staphylococcus aureus infection                  | 1.22E−03 |
| Glycine, serine and threonine metabolism         | 1.62E−03 |
| Lysine degradation                               | 1.78E−03 |
| Adrenergic signaling in cardiomyocytes           | 1.96E−03 |
| Fc gamma R-mediated phagocytosis                 | 1.96E−03 |
| Alcoholic liver disease                          | 2.09E−03 |
| Natural killer cell mediated cytotoxicity        | 2.26E−03 |
| B cell receptor signaling pathway                | 2.53E−03 |
| Amphetamine addiction                            | 2.82E−03 |
| Viral carcinogenesis                             | 3.18E−03 |
| Cocaine addiction                                | 3.18E−03 |
| Breast cancer                                    | 3.22E−03 |
| Cell cycle                                       | 5.23E−03 |
| Hepatocellular carcinoma                         | 5.23E−03 |
| Glutamatergic synapse                            | 5.69E−03 |
| Notch signaling pathway                          | 6.45E−03 |
| Insulin secretion                                | 6.87E−03 |
| Cellular senescence                              | 7.09E−03 |
| Phospholipase D signaling pathway                | 7.17E−03 |
| Morphine addiction                               | 7.18E−03 |
| Cholinergic synapse                              | 8.19E−03 |
| Glioma                                           | 1.04E−02 |
| Vascular smooth muscle contraction               | 1.08E−02 |
| IL-17 signaling pathway                          | 1.09E−02 |
| cGMP-PKG signaling pathway                       | 1.09E−02 |
| Acute myeloid leukemia                           | 1.13E−02 |
| ABC transporters                                 | 1.15E−02 |
| Cushing syndrome                                 | 1.25E−02 |
| Fluid shear stress and atherosclerosis           | 1.25E−02 |
| Other types of O-glycan biosynthesis             | 1.26E−02 |
| Colorectal cancer                                | 1.32E−02 |
| Mucin type O-glycan biosynthesis                 | 1.33E−02 |
| Thyroid hormone synthesis                        | 1.51E−02 |
| EGFR tyrosine kinase inhibitor resistance        | 1.58E−02 |
| Endocrine resistance                             | 1.69E−02 |
| Inflammatory mediator regulation of TRP channels | 1.73E−02 |
| DNA replication                                  | 1.73E−02 |
| Human immunodeficiency virus 1 infection         | 1.75E−02 |
| GABAergic synapse                                | 1.75E−02 |
| Salivary secretion                               | 1.81E−02 |
| Apelin signaling pathway                         | 1.88E−02 |
| Chronic myeloid leukemia                         | 1.91E−02 |
| Cortisol synthesis and secretion                 | 1.94E−02 |
| Melanogenesis                                    | 1.99E−02 |
| Gastric acid secretion                           | 1.99E−02 |
| Pancreatic cancer                                | 1.99E−02 |
| Adherens junction                                | 2.10E−02 |
| One carbon pool by folate                        | 2.10E−02 |
| 2-Oxocarboxylic acid metabolism                  | 2.10E−02 |
| Basal cell carcinoma                             | 2.10E−02 |

|                                     |          |
|-------------------------------------|----------|
| Estrogen signaling pathway          | 2.14E−02 |
| Fatty acid degradation              | 2.16E−02 |
| Antifolate resistance               | 2.16E−02 |
| Calcium signaling pathway           | 2.32E−02 |
| Hippo signaling pathway             | 2.48E−02 |
| Antigen processing and presentation | 2.49E−02 |
| Gastric cancer                      | 2.52E−02 |

**Table S3. Thirty-four differential metabolites identified in positive and negative mode.****In positive mode**

| NO | [M+H] <sup>+</sup><br>(m/z) | Delta<br>(ppm) | Formula                                                         | Metabolites                                      | VIP          | P            |
|----|-----------------------------|----------------|-----------------------------------------------------------------|--------------------------------------------------|--------------|--------------|
| 1  | 99.0650                     | −9.33          | C <sub>5</sub> H <sub>10</sub> NO                               | 2-Piperidinone                                   | 1.7567385022 | 0.0128659156 |
| 2  | 101.1195                    | −9.43          | C <sub>6</sub> H <sub>16</sub> N                                | Hexylamine                                       | 2.0379096022 | 0.0023337061 |
| 3  | 111.0427                    | −4.94          | C <sub>4</sub> H <sub>6</sub> N <sub>3</sub> O                  | Cytosine                                         | 2.0418150497 | 0.0010972827 |
| 4  | 121.0883                    | −7.34          | C <sub>8</sub> H <sub>12</sub> N                                | Phenylethylamine                                 | 1.9814597721 | 0.0024521583 |
| 5  | 160.0991                    | −6.23          | C <sub>10</sub> H <sub>13</sub> N <sub>2</sub>                  | Anatabine                                        | 1.7979543685 | 0.0053108897 |
| 6  | 162.0671                    | −6.28          | C <sub>10</sub> H <sub>11</sub> O <sub>2</sub>                  | 4,5-Dihydro-1-benzoxepin-3(2H)-one               | 2.3499237288 | 0.0000092619 |
| 7  | 188.1285                    | 6.10           | C <sub>7</sub> H <sub>17</sub> N <sub>4</sub> O <sub>2</sub>    | L-Targinine                                      | 1.6074156932 | 0.0156388593 |
| 8  | 190.0366                    | −6.65          | C <sub>9</sub> H <sub>7</sub> N <sub>2</sub> O <sub>3</sub>     | Nitroxoline                                      | 1.2314601400 | 0.0471657634 |
| 9  | 215.0550                    | −3.86          | C <sub>5</sub> H <sub>15</sub> NO <sub>6</sub> P                | Glycerylphosphorylethanolamine                   | 1.6064902294 | 0.0165914871 |
| 10 | 220.1089                    | −4.70          | C <sub>13</sub> H <sub>17</sub> O <sub>3</sub>                  | 1-(5-Acetyl-2-hydroxyphenyl)-3-methyl-1-butanone | 2.3521427735 | 0.0000073518 |
| 11 | 293.1979                    | −3.96          | C <sub>17</sub> H <sub>28</sub> NO <sub>3</sub>                 | Nonivamide                                       | 2.4139510116 | 0.0000004355 |
| 12 | 336.2651                    | −3.91          | C <sub>21</sub> H <sub>37</sub> O <sub>3</sub>                  | Pregnanetriol                                    | 1.6838470507 | 0.0054941678 |
| 13 | 413.3291                    | −0.56          | C <sub>27</sub> H <sub>44</sub> NO <sub>2</sub>                 | 5alpha-Tomatidan-3-one                           | 1.5118790876 | 0.0139911382 |
| 14 | 505.3514                    | −3.65          | C <sub>26</sub> H <sub>53</sub> NO <sub>6</sub> P               | LysoPC(P-18:1(9Z))                               | 1.9615013500 | 0.0004286134 |
| 15 | 511.4947                    | −3.32          | C <sub>32</sub> H <sub>66</sub> NO <sub>3</sub>                 | Cer(d18:0/14:0)                                  | 1.3676883747 | 0.0433282614 |
| 16 | 545.3443                    | −7.11          | C <sub>28</sub> H <sub>53</sub> NO <sub>7</sub> P               | LysoPC(20:3(5Z,8Z,11Z))                          | 1.8926985265 | 0.0011333993 |
| 17 | 723.5180                    | −3.16          | C <sub>41</sub> H <sub>75</sub> NO <sub>7</sub> P               | PE(18:3(6Z,9Z,12Z)/P-18:1(11Z))                  | 2.3330819395 | 0.0000051317 |
| 18 | 728.5802                    | −4.09          | C <sub>41</sub> H <sub>82</sub> N <sub>2</sub> O <sub>6</sub> P | SM(d18:1/18:1(11Z))                              | 1.4632555185 | 0.0264426424 |
| 19 | 743.5798                    | −4.12          | C <sub>42</sub> H <sub>83</sub> NO <sub>7</sub> P               | PC(16:0/P-18:1(11Z))                             | 1.5551483320 | 0.0170014236 |
| 20 | 771.5752                    | −3.44          | C <sub>43</sub> H <sub>83</sub> NO <sub>8</sub> P               | PC(15:0/20:2(11Z,14Z))                           | 1.9614160117 | 0.0008837868 |

**In negative mode**

| NO | [M-H] <sup>−</sup><br>(m/z) | Delta<br>(ppm) | Formula                                                                     | Metabolites                                         | VIP          | P            |
|----|-----------------------------|----------------|-----------------------------------------------------------------------------|-----------------------------------------------------|--------------|--------------|
| 1  | 774.5362                    | −6.28          | C <sub>42</sub> H <sub>78</sub> O <sub>10</sub> P                           | PG(18:0/18:2(9Z,12Z))                               | 1.9623653742 | 0.0009273760 |
| 2  | 282.2534                    | −8.81          | C <sub>18</sub> H <sub>33</sub> O <sub>2</sub>                              | (Z)-13-Octadecenoic acid                            | 1.9108915324 | 0.0010083556 |
| 3  | 792.4869                    | −9.14          | C <sub>44</sub> H <sub>72</sub> O <sub>10</sub> P                           | PG(16:1(9Z)/22:6<br>(4Z,7Z,10Z,13Z,16Z,19Z))        | 2.0001715309 | 0.0010713927 |
| 4  | 912.5654                    | −8.14          | C <sub>49</sub> H <sub>84</sub> O <sub>13</sub> P                           | PI(18:0/22:5(4Z,7Z,10Z,13Z,16Z))                    | 2.0956677860 | 0.0002078235 |
| 5  | 796.5192                    | −7.89          | C <sub>44</sub> H <sub>75</sub> O <sub>10</sub> P                           | PG(16:0/22:5(4Z,7Z,10Z,13Z,16Z))                    | 1.4884584386 | 0.0174221265 |
| 6  | 842.5034                    | 0.77           | C <sub>44</sub> H <sub>73</sub> O <sub>15</sub>                             | Vinaginsenoside R1                                  | 1.5139760286 | 0.0193148061 |
| 7  | 816.4863                    | −9.61          | C <sub>46</sub> H <sub>72</sub> O <sub>10</sub> P                           | PG(18:3(6Z,9Z,12Z)/22:6<br>(4Z,7Z,10Z,13Z,16Z,19Z)) | 1.7761854290 | 0.0031726938 |
| 8  | 228.0051                    | −7.22          | C <sub>13</sub> H <sub>7</sub> S <sub>2</sub>                               | 5-Ethynyl-5'-(1-propynyl)-<br>2,2'-bithiophene      | 1.2755898001 | 0.0495846592 |
| 9  | 304.2378                    | −8.00          | C <sub>20</sub> H <sub>31</sub> O <sub>2</sub>                              | Mesterolone                                         | 1.3987605779 | 0.0261059783 |
| 10 | 174.0170                    | 3.40           | C <sub>6</sub> H <sub>5</sub> O <sub>6</sub>                                | cis-Aconitic acid                                   | 1.4947798644 | 0.0234651146 |
| 11 | 213.0073                    | 0.71           | C <sub>5</sub> H <sub>8</sub> Cl <sub>2</sub> N <sub>3</sub> O <sub>2</sub> | Carmustine                                          | 1.4687272903 | 0.0179947660 |
| 12 | 818.5037                    | −7.38          | C <sub>46</sub> H <sub>74</sub> O <sub>10</sub> P                           | PG(18:2(9Z,12Z)/22:6<br>(4Z,7Z,10Z,13Z,16Z,19Z))    | 1.5661563684 | 0.0119455349 |
| 13 | 111.0427                    | −4.94          | C <sub>2</sub> H <sub>4</sub> NO <sub>2</sub>                               | Glycine                                             | 1.4715910009 | 0.0206321526 |
| 14 | 256.2379                    | −8.97          | C <sub>16</sub> H <sub>31</sub> O <sub>2</sub>                              | Isopalmitic acid                                    | 1.4663757188 | 0.0240594117 |
